# Supplementary material for: Development and application of a monoclonal antibody-based blocking ELISA for detection of antibodies to Tembusu virus in multiple poultry species
Source: PubMed Central journal article supplement (PMC6019803; doi:10.1186/s12917-018-1537-6), 2018-06-25
Supplement: 12917_2018_1537_MOESM1_ESM.pdf [file 12917_2018_1537_MOESM1_ESM.pdf]

**Development of an epitope-blocking ELISA for detection of antibodies against Tembusu virus in  
domestic birds**

**BMC Veterinary Research**

Lijiao Zhang, Zhanhong Li, Huan Jin, Xueying Hu, Jingliang Su

Lijiao Zhang, Institution: .Key Laboratory of Animal Epidemiology and Zoonosis, Ministry of Agriculture,  
College of Veterinary Medicine, China Agricultural University, Beijing 100193, China, Email:  
zhang62810003@126.com

Zhanhong Li, Institution: .Key Laboratory of Animal Epidemiology and Zoonosis, Ministry of Agriculture,  
College of Veterinary Medicine, China Agricultural University, Beijing 100193, China, Email:  
dy0811zh@163.com

Huan Jin, Institution: .Key Laboratory of Animal Epidemiology and Zoonosis, Ministry of Agriculture,  
College of Veterinary Medicine, China Agricultural University, Beijing 100193, China, Email:  
jinhuan0717@126.com

Xueying Hu, Institution: College of Veterinary Medicine, Huazhong Agricultural University, Wuhan  
430070, China, Email: hxying@mail.hzau.edu.cn

Corresponding author: Jingliang Su, Institution: .Key Laboratory of Animal Epidemiology and Zoonosis,  
Ministry of Agriculture, College of Veterinary Medicine, China Agricultural University, Beijing 100193,  
China, Email: suzhang@cau.edu.cn; tel: +86-10-62732312.

Running title: Blocking ELISA for Tembusu virus antibody detection

## **Recombinant plasmid construction and Protein expression**

Ectodomain, domain I/II (D I/II) and domain III (D III) gene of E protein of DTMUV JXSP were amplified by polymerase chain reaction (PCR) using the primers listed in table S1, the BamH I and XhoI I restriction sites were underlined. Three PCR products were gel-purified and digested with restriction enzymes BamH I / XhoI I followed by cloning into the expression vector pET32 $\alpha$  (Novagen, Madison, USA) to construct the recombinant plasmid pET32/E, pET32/D I/II and pET32/D III. The plasmids were then transfected into *E. coli* transetta (DE3) (TransGen Biotech, Beijing, China). The expressed fusion protein of E, E D I/II and E D III were existed in the form of inclusion body and then preliminarily purified with washing buffer (50 mM Tris-HCl, 10 mM EDTA, 0.5% Triton X-100 and 0.15 M NaCl) and denatured in lysis buffer (50 mM Tris-HCl, 2 mM EDTA, 6 M Guanidine hydrochloride and 10 mM dithiothreitol) overnight at 4 °C. The denatured proteins were then renatured in renaturation buffer (50 mM Tris-HCl, 0.2 mM EDTA, 0.5 mM Arg, 1 mM GSSG, 3 mM GSH, 1 M Guanidine hydrochloride and 0.15 M NaCl ) to reform the disulfide bridges and then desalinated by dialysis. The plasmid PET32 $\alpha$  without inserted gene was performed in the same way as control. The renatured proteins were analysed by SDS-PAGE both under non-reducing and reducing condition. The SDS-PAGE analysis showed that each renatured protein presented a clear target band and the molecular weight of each of them was slightly lower under non-reducing condition (Fig. S2), This because that the renatured protein could not completely linearized under non-reducing condition which reducing the SDS binding capacity. The result indicated that these recombinant proteins were successfully expressed and renatured.

**Table S1** Primers used for the amplification of E ectodomain and different regions

| Region       | Primer name   | Primer sequence                               | Production |
|--------------|---------------|-----------------------------------------------|------------|
| E ectodomain | TMUVE F       | 5'-CGC <u>GGATCCT</u> TCAGCTGTCTGGGGATGCAG-3' |            |
|              | TMUVE R       | 5'-ATC <u>TCGAGT</u> GCTCCTTTGAGTGTTGAC-3'    | 1245 nt    |
| E D I/II     | TMUV E F      | 5'-CGC <u>GGATCCT</u> TCAGCTGTCTGGGGATGCAG-3' |            |
|              | TMUV D I/II R | 5'-ATC <u>TCGAGC</u> ATTCTTCAGCTTCAGA-3'      | 900 nt     |
| E D III      | TMUV D III F  | 5'-CGC <u>GGATCC</u> ACCTACCCGATGTGTAGCAA-3'  |            |
|              | TMUV E R      | 5'-ATC <u>TCGAGT</u> GCTCCTTTGAGTGTTGAC-3'    | 345 nt     |

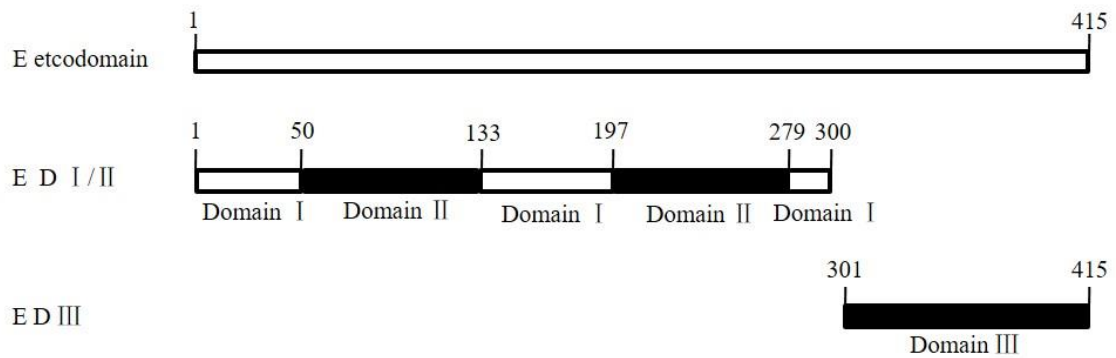

**Fig. S1** Domain diagram of envelope protein of DTMOV

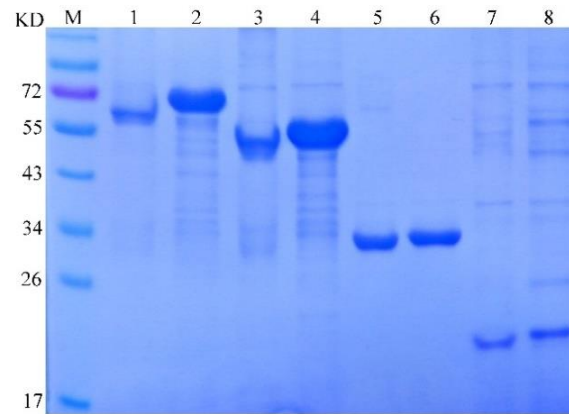

**Fig. S2** SDS-PAGE analysis of renatured recombinant expression protein. **(1&2)** Pet32a-E protein; **(3&4)** Pet32a-D I-II protein; **(5&6)** Pet32a-D III protein; **(7&8)** Pet 32a tag protein; **(1&3&5&7)** Proteins under non-reducing condition; **(2&4&6&8)** Proteins under reducing condition
